# Supplementary material for: Noncovalently functionalized highly conducting carbon nanotube films with enhanced doping stability via an amide linkage
Source: Royal Society of Chemistry journal article supplement (doi:10.1039/c3cc38188a), 2013-01-01
Supplement: c3cc38188a.pdf [file c3cc38188a.pdf]

Electronic Supplementary Information to

# **Noncovalent functionalized highly conducting carbon nanotube films with enhanced doping stability via an amide linkage**

I-Wen Peter Chen\*

Department of Applied Science, National Taitung University, Taitung City 95002, Taiwan

|                   |                                                                                                                                   |          |
|-------------------|-----------------------------------------------------------------------------------------------------------------------------------|----------|
| <b>1. Fig. S1</b> | <b>Transmission FT-IR spectra of (a) pure SWCNT film (b) cross-linked SWCNT films.....</b>                                        | <b>2</b> |
| <b>2. Fig. S2</b> | <b>Tensile stress–strain curves of cross-linked and pristine SWCNT film .....</b>                                                 | <b>3</b> |
| <b>3. Fig. S3</b> | <b>SEM images of (a) pristine SWCNT film (b) cross-linked SWCNT film .....</b>                                                    | <b>4</b> |
| <b>4. Fig. S4</b> | <b>SEM images of a fracture surface of cross-linked SWCNT film .....</b>                                                          | <b>5</b> |
| <b>5. Fig. S5</b> | <b>I–V curves of ITO electrode, pristine SWCNTs film, (1-AP)-SWCNTs film, (PSE)-SWCNTs film and cross-linked SWCNT film .....</b> | <b>6</b> |

Fig. S1 shows the IR spectra of the pristine SWCNT and cross-linked SWCNT films. The peak at  $1670\text{ cm}^{-1}$  can be attributed to the carbonyl stretching mode of the amide group, while the peaks at  $1540\text{ cm}^{-1}$  and  $3645\text{ cm}^{-1}$  correspond to the bending and stretching of the amide N-H group, respectively.<sup>33</sup> These characteristic peaks demonstrate that the amide groups were formed in the SWCNT films. According to the IR spectra analysis, we hypothesize that individual SWCNTs might be linked using amide linkers to form a 3D cross-linked structure via carbodiimide chemistry. The peaks at  $1310\text{ cm}^{-1}$  and  $1115\text{ cm}^{-1}$  correlated with the vibration of C-N-C and N-C-O in N-hydroxysuccinimide, respectively.

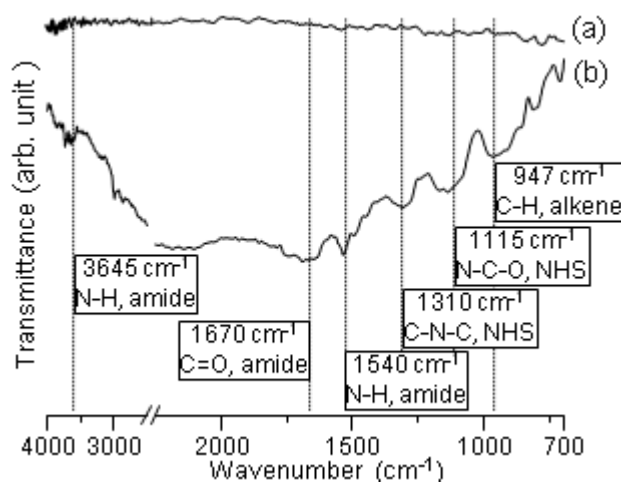

**Fig. 1** Transmission FT-IR spectra of (a) pure SWCNT film (b) cross-linked SWCNT films

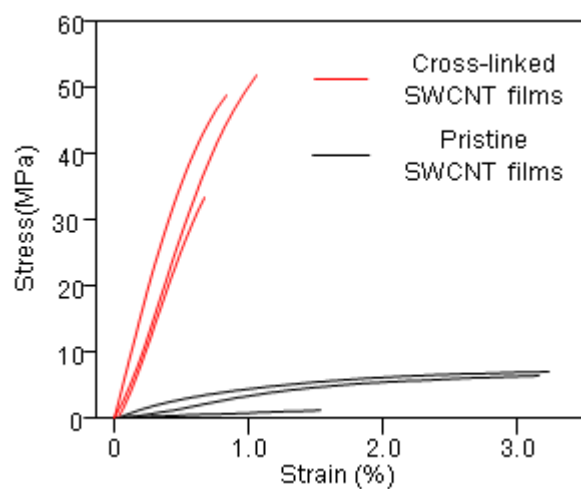

**Fig. S2 Tensile stress–strain curves of cross-linked (red line) and pristine (black line) SWCNT film.**

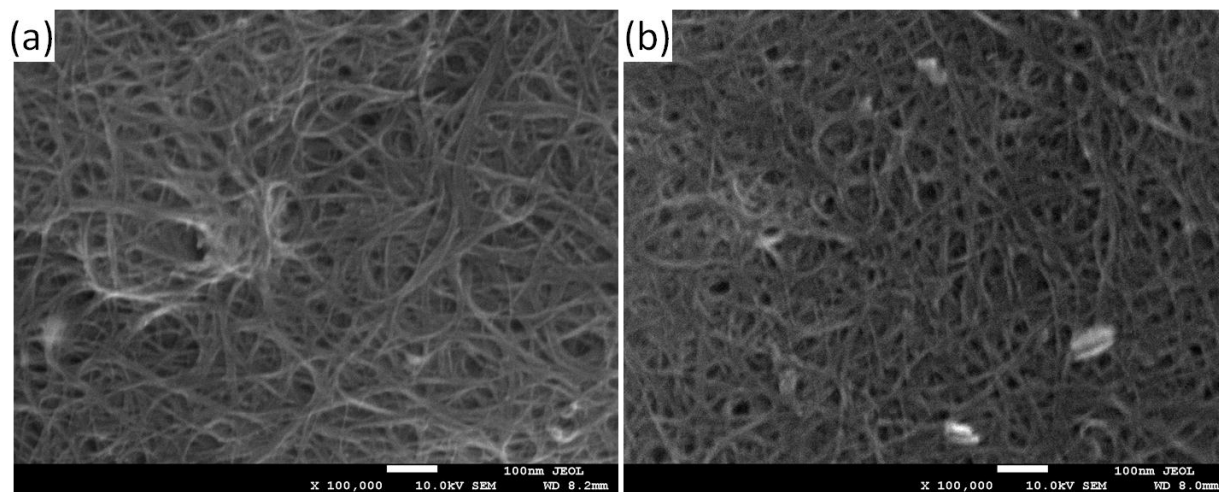

**Fig. S3 SEM images of (a) pristine SWCNT film (b) cross-linked SWCNT film.**

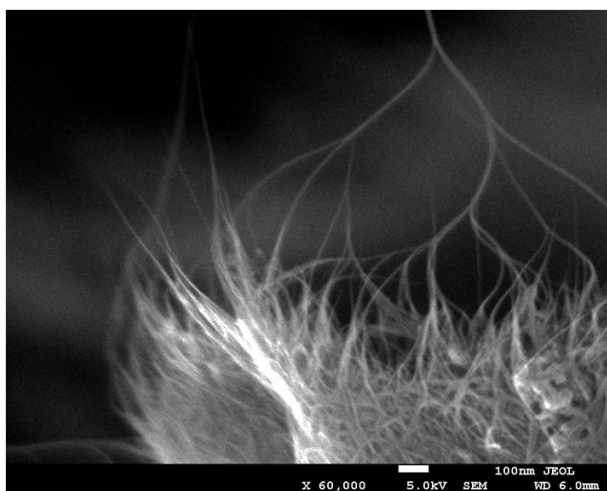

**Fig. S4 SEM images of a fracture surface of cross-linked SWCNT film.**

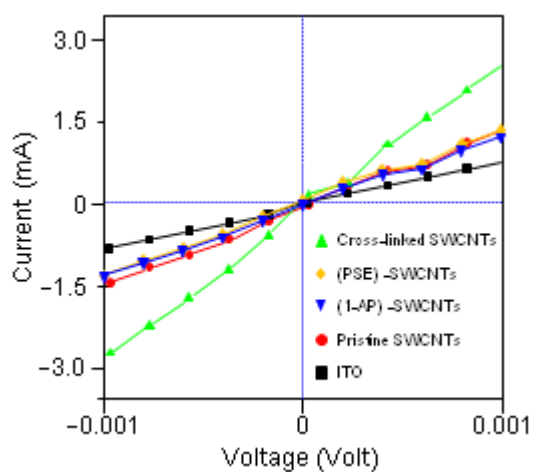

**Fig. S5** I–V curves of ITO electrode, pristine SWCNTs film, (1-AP)-SWCNTs film, (PSE)-SWCNTs film and cross-linked SWCNT film.
